# Supplementary material for: Eicosapentaenoic acid is associated with the attenuation of dysfunctions of mesenchymal stem cells in the abdominal aortic aneurysm wall
Source: Royal Society of Chemistry journal article supplement (doi:10.1039/d2fo01102f), 2022-01-01
Supplement: d2fo01102f2.pdf [file d2fo01102f2.pdf]

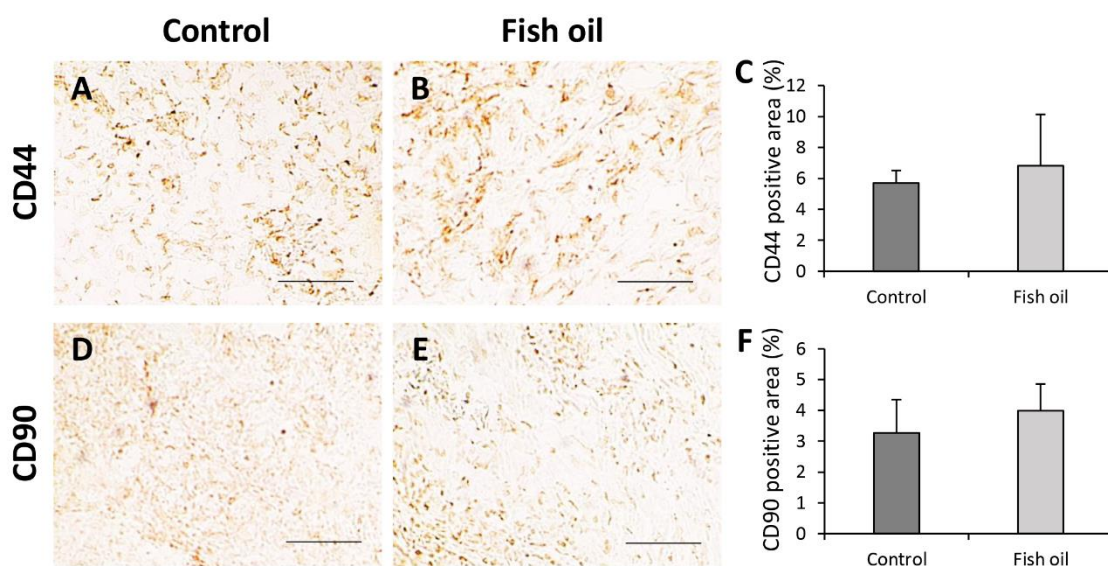

**Supplementary Fig. 1** Immunohistochemical staining for mesenchymal stem cell markers in hypoperfusion-induced abdominal aortic aneurysm wall. Representative images of immunostaining for CD44 in the control (A) and fish oil (B) groups. (C) Quantification of CD44 positive area. Representative images of immunostaining for CD90 in the control (D) and fish oil (E) groups. (F) Quantification of CD90 positive area. Scale bars = 100  $\mu$ m. Data are expressed as the mean  $\pm$  SD (n = 7). \* Represents a significant difference ( $p < 0.05$ ).
